# Supplementary material
Source: PubMed Central journal article supplement (PMC6112419)
Supplement: NIHMS79135-supplement-Data_vocalistations.pdf [file NIHMS79135-supplement-Data_vocalistations.pdf]

| picture type   | dog    | breed function | skull type | directed at picture | whine | bark | growl | other |
|----------------|--------|----------------|------------|---------------------|-------|------|-------|-------|
| human profile  | Bruni  | other          | meso       | no                  | +     |      |       |       |
| human profile  | Bruni  | other          | meso       | no                  | +     |      |       |       |
| dog portrait   | Bruni  | other          | meso       | no                  | +     |      |       |       |
| dog profile    | Bruni  | other          | meso       | no                  | +     |      |       |       |
| human portrait | Bruni  | other          | meso       | no                  | +     |      |       |       |
| dog profile    | Bruni  | other          | meso       | no                  | +     |      |       |       |
| dog portrait   | Bruni  | other          | meso       | no                  | +     |      |       |       |
| human portrait | Bruni  | other          | meso       | no                  | +     |      |       |       |
| human profile  | Bruni  | other          | meso       | no                  | +     |      |       |       |
| dog portrait   | Bruni  | other          | meso       | no                  | +     |      |       |       |
| dog profile    | Bruni  | other          | meso       | no                  | +     |      |       |       |
| human portrait | Bruni  | other          | meso       | no                  | +     |      |       |       |
| human portrait | Bruni  | other          | meso       | no                  | +     |      |       |       |
| dog profile    | Bruni  | other          | meso       | no                  | +     |      |       |       |
| human profile  | Bruni  | other          | meso       | no                  | +     |      |       |       |
| human profile  | Daisy  | other          | brachy     | yes                 | +     |      |       |       |
| human profile  | Daisy  | other          | brachy     | no                  | +     |      |       |       |
| dog portrait   | Daisy  | other          | brachy     | no                  | +     |      |       |       |
| human profile  | Daisy  | other          | brachy     | no                  | +     |      |       |       |
| human portrait | Daisy  | other          | brachy     | no                  |       |      |       | +     |
| dog profile    | Daisy  | other          | brachy     | no                  | +     |      |       |       |
| human profile  | Daisy  | other          | brachy     | no                  | +     |      |       |       |
| human portrait | Foltos | independent    | meso       | yes                 | +     |      |       |       |
| dog portrait   | Lajos  | other          | brachy     | yes                 |       |      | +     |       |
| human profile  | Lajos  | other          | brachy     | yes                 |       |      |       | +     |
| human profile  | Maya   | independent    | meso       | yes                 | +     |      | +     |       |
| human portrait | Maya   | independent    | meso       | yes                 | +     |      |       |       |
| dog portrait   | Miró1  | cooperative    | meso       | yes                 |       | +    |       |       |
| dog profile    | Miró1  | cooperative    | meso       | yes                 |       | +    |       |       |

|                |        |             |      |     |  |   |   |   |
|----------------|--------|-------------|------|-----|--|---|---|---|
| human portrait | Odie   | independent | meso | yes |  | + | + |   |
| human profile  | Odie   | independent | meso | yes |  | + | + |   |
| dog portrait   | Odie   | independent | meso | yes |  | + | + |   |
| dog profile    | Odie   | independent | meso | yes |  | + | + |   |
| human portrait | Odie   | independent | meso | yes |  | + | + |   |
| dog portrait   | Odie   | independent | meso | yes |  | + | + |   |
| dog profile    | Odie   | independent | meso | yes |  | + | + |   |
| human portrait | Odie   | independent | meso | yes |  | + | + |   |
| dog profile    | Odie   | independent | meso | yes |  | + |   |   |
| human profile  | Odie   | independent | meso | yes |  | + | + |   |
| dog profile    | Odie   | independent | meso | no  |  |   |   | + |
| human profile  | Odie   | independent | meso | no  |  | + |   |   |
| human profile  | Odie   | independent | meso | no  |  |   | + |   |
| human portrait | Scooby | cooperative | meso | no  |  | + |   |   |
| dog profile    | Scooby | cooperative | meso | no  |  |   |   | + |
| dog profile    | Scooby | cooperative | meso | no  |  | + |   |   |
| human portrait | Scooby | cooperative | meso | no  |  |   |   | + |
| dog profile    | Scooby | cooperative | meso | no  |  |   |   | + |
| dog portrait   | Sophie | independent | meso | yes |  | + | + |   |
| human portrait | Sophie | independent | meso | yes |  | + | + |   |
| dog profile    | Sophie | independent | meso | yes |  | + | + |   |
| dog profile    | Sophie | independent | meso | yes |  | + | + |   |
| human portrait | Sophie | independent | meso | yes |  | + |   |   |
| dog profile    | Sophie | independent | meso | yes |  | + | + |   |
| human portrait | Sophie | independent | meso | yes |  |   |   | + |
| dog profile    | Sophie | independent | meso | yes |  | + | + |   |
| dog portrait   | Sophie | independent | meso | yes |  | + |   |   |
| human portrait | Sophie | independent | meso | yes |  | + | + |   |
| dog portrait   | Sophie | independent | meso | yes |  | + |   | + |
| dog portrait   | Sophie | independent | meso | yes |  | + | + |   |
| dog profile    | Sophie | independent | meso | yes |  | + | + |   |

|              |        |             |         |     |   |   |   |  |
|--------------|--------|-------------|---------|-----|---|---|---|--|
| dog portrait | Sophie | independent | meso    | yes |   | + | + |  |
| dog portrait | Zufi   | independent | dolicho | no  | + |   |   |  |

The vocalizations listed for each trial and dog (trials sequenced for each dog in order of appearance). For each trial, we list the picture type presented, the dog that vocalized, its breed function, skull type, the type(s) of vocalization and whether the vocalization was directed at the screen/picture.
